# Supplementary material
Source: publisher figshare collection journal article supplement (https://gsajournals.figshare.com/ndownloader/files/27743271)
Supplement: Supplementary file 1 [file 27743271]

| **Table S7.** Filtering PacBio subread summary. | | |  |  |
| --- | --- | --- | --- | --- |
| **# of Bases** | **# of Reads** | **N50 Read Length** | **Mean Read Length** | **Max Read Length** |
| 43,659,907,645 | 3,570,453 | 14,839 | 12,228 | 104,685 |
